# Supplementary material
Source: PubMed Central journal article supplement (PMC5399128)

## **SUPPLEMENTAL DATA**

### **Molecular determinants of the N-terminal acetyltransferase Naa60 anchoring to the Golgi membrane**

Henriette Aksnes<sup>1\*</sup>, Marianne Goris<sup>1\*</sup>, Øyvind Strømmland<sup>1</sup>, Adrian Drazic<sup>1</sup>, Qaiser Waheed<sup>1,2</sup>, Nathalie Reuter<sup>1,2</sup>, and Thomas Arnesen<sup>1,3</sup>

<sup>1</sup> Department of Molecular Biology, University of Bergen, N-5020 Bergen, Norway.

<sup>2</sup> Computational Biology Unit, Department of Informatics, University of Bergen, N-5020 Bergen, Norway.

<sup>3</sup> Department of Surgery, Haukeland University Hospital, N-5021 Bergen, Norway.

\* Equal contributions

**Table S1. All mutations performed on Naa60, purpose of the mutation and consequence observed by microscopy and carbonate wash assay when applied.** Abbreviations: <1/2, less than half of the proteins extracted; 1/2, half of the proteins extracted; >1/2, more than half of the proteins extracted;  $\phi$ , hydrophobic amino acid; SF, by subcellular fractionation. Numbers in [] are internal plasmid numbers.

| Mutation                                                           | Concept tested                                                                   | Localization by microscopy |                | Org fraction extractable by high pH? |
|--------------------------------------------------------------------|----------------------------------------------------------------------------------|----------------------------|----------------|--------------------------------------|
|                                                                    |                                                                                  | Cyto                       | Org            |                                      |
| Naa60-(1-242)-eGFP [134]                                           | Ctrl, full-length                                                                |                            | x              | some (<1/2)                          |
| <b>C-truncations (Fig 3B/E)</b>                                    |                                                                                  |                            |                |                                      |
| Naa60-(1-182)-eGFP [439]                                           | Lacking last 61 aa                                                               | x                          |                |                                      |
| Naa60-(1-216)-eGFP [207]                                           | Lacking last 26 aa                                                               | x                          | x              |                                      |
| Naa60-(1-225)-eGFP [440]                                           | Lacking last 17 aa                                                               | some                       | x              | yes (1/2)                            |
| Naa60-(1-230)-eGFP [449]                                           | Lacking last 12 aa                                                               | some                       | x              |                                      |
| Naa60-(1-236)-eGFP [450]                                           | Lacking last 6 aa                                                                | ?                          | x              |                                      |
| <b>N-truncations (eGFP targeting assay) (Fig 3C/E)</b>             |                                                                                  |                            |                |                                      |
| eGFP-Naa60-(182-242) [131]                                         | eGFP targeting using the last 61 aa of Naa60                                     |                            | x              |                                      |
| eGFP-Naa60-(192-242) [349]                                         | eGFP targeting using the last 51 aa of Naa60                                     |                            | x              |                                      |
| eGFP-Naa60-(202-242) [363]                                         | eGFP targeting using the last 41 aa of Naa60                                     | x                          | x              |                                      |
| eGFP-Naa60-(217-242) [132]                                         | eGFP targeting using the last 26 aa of Naa60                                     | x                          |                |                                      |
| <b>Deletions Pred-<math>\alpha</math>1 and extended (Fig 3D/E)</b> |                                                                                  |                            |                |                                      |
| Delta 191-200 [364]                                                | Most of Pred- $\alpha$ 1                                                         | x                          | x              | yes (>1/2)                           |
| Delta 191-209 [409]                                                | Pred- $\alpha$ 1 extended                                                        | x                          |                |                                      |
| Delta 203-210 [457]                                                | Between Pred- $\alpha$ -Helices                                                  |                            | x<br>(more ER) |                                      |
| <b>Deletions Pred-<math>\alpha</math>2 and extended (Fig 3D/E)</b> |                                                                                  |                            |                |                                      |
| Delta 213-222 [365]                                                | Most of Pred- $\alpha$ 2                                                         | x                          | x              | yes (~ completely)                   |
| Delta 213-230 [458]                                                | Pred- $\alpha$ 2 extended                                                        | x                          | x              |                                      |
| Delta 213-236 [459]                                                | Pred- $\alpha$ 2 further extended                                                | x                          | x              |                                      |
| Delta 211-216 [421]                                                | 1 <sup>st</sup> half of Pred- $\alpha$ 2                                         | x                          | x              |                                      |
| <b>Mutations in Pred-<math>\alpha</math>1 (Fig 4 and S1)</b>       |                                                                                  |                            |                |                                      |
| I190A/L191A/Y193A/I194A [370]                                      | $\phi$ in Pred- $\alpha$ 1 $\rightarrow$ A                                       | x                          | x              | yes (>1/2)                           |
| I190E/L191E/Y193E/I194E [389]                                      | $\phi$ in Pred- $\alpha$ 1 $\rightarrow$ E                                       | x                          | x              | yes (>1/2)                           |
| L197A/L201A/L204A/I209A [428]                                      | $\phi$ in Pred- $\alpha$ 1 $\rightarrow$ A                                       | x                          | some           | yes (~ completely)                   |
| L197E/L201E/L204E/I209E [429]                                      | $\phi$ in Pred- $\alpha$ 1 $\rightarrow$ E                                       | x                          |                |                                      |
| <b>L197/L201/L204A [435]</b>                                       | <b><math>\phi</math> in Pred-<math>\alpha</math>1 <math>\rightarrow</math> A</b> | <b>x</b>                   | <b>x</b>       | <b>yes (&gt;1/2)</b>                 |
| L197/L201/L204E [436]                                              | 204/209E effective. Skew it Nt dir. E mut                                        | x                          | some           |                                      |
| L201/L204/I209A [433]                                              | $\phi$ in Pred- $\alpha$ -Helix1 $\rightarrow$ A                                 | x                          | x              |                                      |
| L201/L204/I209E [434]                                              | 204/209E effective. Extend it Nt dir. E mut                                      | x                          |                |                                      |
| I190/L191A [451]                                                   | $\phi$ in Pred- $\alpha$ -Helix1 $\rightarrow$ A                                 |                            | x              |                                      |
| Y193/I194A [454]                                                   | $\phi$ in Pred- $\alpha$ 1 $\rightarrow$ A                                       |                            | x              |                                      |
| Y194/L197A [455]                                                   | $\phi$ in Pred- $\alpha$ 1 $\rightarrow$ A                                       |                            | x              |                                      |
| L197A/L201A [456]                                                  | $\phi$ in Pred- $\alpha$ 1 $\rightarrow$ A                                       |                            | x              |                                      |
| L201/L204A [462]                                                   | $\phi$ in Pred- $\alpha$ 1 $\rightarrow$ A                                       |                            | x              |                                      |
| L204/I209A [430]                                                   | $\phi$ in between Pred- $\alpha$ 1 and 2 $\rightarrow$ A                         |                            | x              |                                      |
| L204E/I209E [398]                                                  | $\phi$ in between Pred- $\alpha$ 1 and 2 $\rightarrow$ E                         | x                          | x              | yes(>1/2)                            |
| L204E [431]                                                        | Effective when comb w 209E. Alone?                                               |                            | x              |                                      |
| I209E [432]                                                        | Effective when comb w 204E. Alone?                                               | x                          | x              |                                      |
| I190E/L191E/Y193E/I194E + L204E/I209E [416]                        | Mut $\phi$ in extended Pred- $\alpha$ 1 to E                                     | x                          |                |                                      |

Table S1

|                                                                                                   |                                                                                |             |            |                |
|---------------------------------------------------------------------------------------------------|--------------------------------------------------------------------------------|-------------|------------|----------------|
| D192A/H196A [366]                                                                                 | Electrostatic interactions?                                                    |             | x          | some (like WT) |
| D192A [468]                                                                                       | Alone?                                                                         |             | x          |                |
| H185/H196A [464]                                                                                  | Electrostatic interactions?                                                    |             | x          |                |
| <b>Mutations in Pred-<math>\alpha</math>2 (Fig 5 and S2)</b>                                      |                                                                                |             |            |                |
| I209/V213/Y214A [424]                                                                             | Mut $\phi$ in Pred- $\alpha$ 2+209 to A                                        | some        | x          |                |
| I209/V213/Y214E [425]                                                                             | Mut $\phi$ in Pred- $\alpha$ 2+209 to E                                        | x           | x          |                |
| V213/Y214A [422]                                                                                  | Mut $\phi$ in Pred- $\alpha$ 2 to A                                            | ?           | x          |                |
| V213/Y214E [423]                                                                                  | Mut $\phi$ in Pred- $\alpha$ 2 to E                                            | some        | x          |                |
| V213E [443]                                                                                       | Mut $\phi$ in Pred- $\alpha$ 2 to E                                            | some        | x          |                |
| L220/221E [396]                                                                                   | Mut $\phi$ in Pred- $\alpha$ 2 to E                                            | ?           | x          |                |
| L220/L221/F224/L225A [460]                                                                        | Mut $\phi$ in Pred- $\alpha$ 2 to A                                            | some        | x          | yes (1/2)      |
| F224/L225/W227/I230A [426]                                                                        | Mut $\phi$ in Pred- $\alpha$ 2 to A                                            | some        | x          |                |
| F224/L225/W227/I230E [427]                                                                        | Mut $\phi$ in Pred- $\alpha$ 2 to E                                            | some        | x          | yes (1/2)      |
| F224A/L225A [441]                                                                                 | Mut $\phi$ in Pred- $\alpha$ 2 to A                                            |             | x          |                |
| F224E/L225E [442]                                                                                 | Mut $\phi$ in Pred- $\alpha$ 2 to E                                            | ?           | x          |                |
| H211A/R212A/R215A/H218A [367]                                                                     | Electrostatic interactions?                                                    | SF          | x          | some (like WT) |
| H211A/R212A [465]                                                                                 | Electrostatic interactions?                                                    |             | x          |                |
| R212A/R215A [466]                                                                                 | Electrostatic interactions?                                                    |             | x          |                |
| R215A/H218A [467]                                                                                 | Electrostatic interactions?                                                    |             | x          |                |
| <b>Combined mutations in Pred-<math>\alpha</math>1 + Pred-<math>\alpha</math>2 (Fig 5 and S2)</b> |                                                                                |             |            |                |
|                                                                                                   |                                                                                | <b>Cyto</b> | <b>Org</b> |                |
| Delta 191-200 + H211A/R212A/R215A/H218A [392]                                                     | Delete most of Pred- $\alpha$ 1 + Mut charge in Pred- $\alpha$ 2               | x           | x          |                |
| Delta 213-222 + D192A/H196A [394]                                                                 | Delete most of Pred- $\alpha$ 2 + Mut charge in Pred- $\alpha$ 1               | x           | x          |                |
| I190E/L191E/Y193E/I194E + H211A/R212A/R215A/H218A [411]                                           | Mut $\phi$ in Pred- $\alpha$ 1 to E + Mut charge in Pred- $\alpha$ 2           | x           | x          |                |
| I190E/L191E/Y193E/I194E + V213E [414]                                                             | Mut $\phi$ in Pred- $\alpha$ 1 to E + Mut $\phi$ in Pred- $\alpha$ 2 to E      | x           | some       |                |
| I190E/L191E/Y193E/I194E + L220/221E [415]                                                         | Mut $\phi$ in Pred- $\alpha$ 1 to E + Mut $\phi$ in Pred- $\alpha$ 2 to E      | x           |            |                |
| I190E/L191E/Y193E/I194E + C222S [412]                                                             | Mut $\phi$ in Pred- $\alpha$ 1 to E + Mut put palmitoylation site              | x           | x          |                |
| I190E/L191E/Y193E/I194E + F224E/L225E [413]                                                       | Mut $\phi$ in Pred- $\alpha$ 1 to E + Mut $\phi$ in/near Pred- $\alpha$ 2 to E | x           |            |                |
| D192A/H196A + H211A/R212A/R215A/H218A [419]                                                       | Mut charge in Pred- $\alpha$ 1 and Pred- $\alpha$ 2 to A                       | ?           | x          |                |
| L197/L201/L204A + H211A/R212A/R215A/H218A [445]                                                   | Mut $\phi$ in Pred- $\alpha$ 1 to A + Mut charge in Pred- $\alpha$ 2           | x           | x          |                |
| L197/L201 + I209/V213/Y214A [463]                                                                 | Mut $\phi$ in Pred- $\alpha$ 1 to A + Mut $\phi$ in Pred- $\alpha$ 2 to A      | x           | weak       |                |
| L197/L201/L204A + F224/L225/W227/I230A [448]                                                      | Mut $\phi$ in Pred- $\alpha$ 1 to A + Mut $\phi$ in Pred- $\alpha$ 2 to A      | x           |            |                |
| H211A/R212A/R215A/H218A + K233A/R240A [446]                                                       | Mut charge in Pred- $\alpha$ 1 + mut charge in C-term                          |             | x          |                |
| L204E/I209E + L220/221E [418]                                                                     | Mut $\phi$ in Pred- $\alpha$ 2 + 204/209 to E                                  | x           |            |                |
| L204E + H211A/R212A/R215A/H218A [417]                                                             | Mut 204E + Mut charge in Pred- $\alpha$ 2                                      | x           | x          |                |

## SUPPLEMENTAL FIGURE LEGENDS

**Supplemental figure 1. Mutated constructs of Naa60-eGFP demonstrated hydrophobic amino acids within Pred- $\alpha$ 1 important for membrane association *in cellulo*.** HeLa cells were transfected with the indicated Naa60-eGFP constructs (A) and imaged live (B) or subjected to subcellular fractionation followed by high pH/sodium carbonate mediated protein extraction from membranes (C). **A.** The sequence of the Naa60 C-terminal tail as in Figure 1. Arrows indicate the positions of mutations shown in B and C, and are color coded accordingly. **B.** Subcellular localization of Naa60-eGFP mutated constructs in the area of Pred- $\alpha$ 1 as indicated with corresponding colors in A. Scale bar is 10  $\mu$ m and is representative for all microscopic images. **C.** Cells were transfected with the indicated constructs and subjected to high pH/sodium carbonate mediated protein extraction from membranes following subcellular fractionation and immunoblotting. The peripheral membrane protein GM130 and transmembrane RCAS1 were used as controls for extractable and un-extractable modes of membrane binding. Supplements data in Figure 4B-C.

**Supplemental figure 2. Mutated constructs of Naa60-eGFP demonstrated amino acids within Pred- $\alpha$ 2 important for membrane association *in cellulo*.** HeLa cells were transfected with the indicated Naa60-eGFP constructs (A) and imaged live (B) or subjected to subcellular fractionation followed by high pH/sodium carbonate mediated protein extraction from membranes (C). **A.** The sequence of the Naa60 C-terminal tail as in Figure 1. Arrows indicate the positions of mutations shown in B and C, and are color coded accordingly. **B.** Subcellular localization of Naa60-eGFP mutated constructs in the area of Pred- $\alpha$ 1 as indicated with corresponding colors in A. **C.** Cells were transfected with the indicated constructs and subjected to high pH/sodium carbonate mediated protein extraction from membranes following subcellular fractionation and immunoblotting. The peripheral membrane protein GM130 and transmembrane RCAS1 were used as controls for extractable and un-extractable modes of membrane binding. Supplements data in Figure 4D-E.

**Supplemental figure 3. Anti-Naa60<sub>192-242</sub> antibody validation for detection of Naa60<sub>189-242</sub> peptide.** The specificity of the anti-Naa60<sub>192-242</sub> (Abcam 103800) antibody used to detect the Naa60<sub>189-242</sub> peptide in pull down experiments was determined by a dot blot. Ratios from 0.1 to 10 pmol Naa60<sub>189-242</sub> peptide were spotted on a nitrocellulose membrane, in addition to 10 pmol of the negative control peptide SESS (SESSSKS RWGRPVGRRRRPVRVYP). The dot blots were incubated with either anti-Naa60<sub>192-242</sub> or custom-made anti-Naa10 antibody before detection. Supplements data in Figure 7A.

**Supplemental figure 4. Far UV-CD experiments supporting Naa60<sub>189-242</sub> folding most optimal in the presence of PI4P over all other PI.** PI4P liposomes induce the most favorable Naa60<sub>189-242</sub> helical spectra, when compared to all other PI-liposomes. Far UV-CD spectra of 20  $\mu$ M Naa60<sub>189-242</sub> in the presence of 360  $\mu$ M liposomes containing 92 mol % PC and 8 mol % of either PI3P, PI4P, PI5P, PI(3,4)P2, PI(3,5)P2, PI(4,5)P2 or PIP3. n = 2 for all experiments. Related to data in Figure 7D.

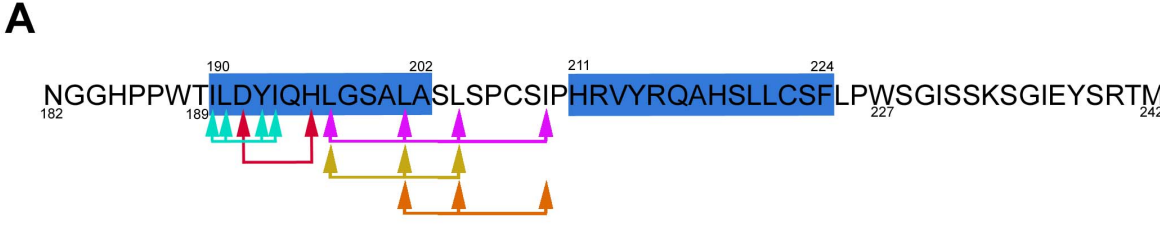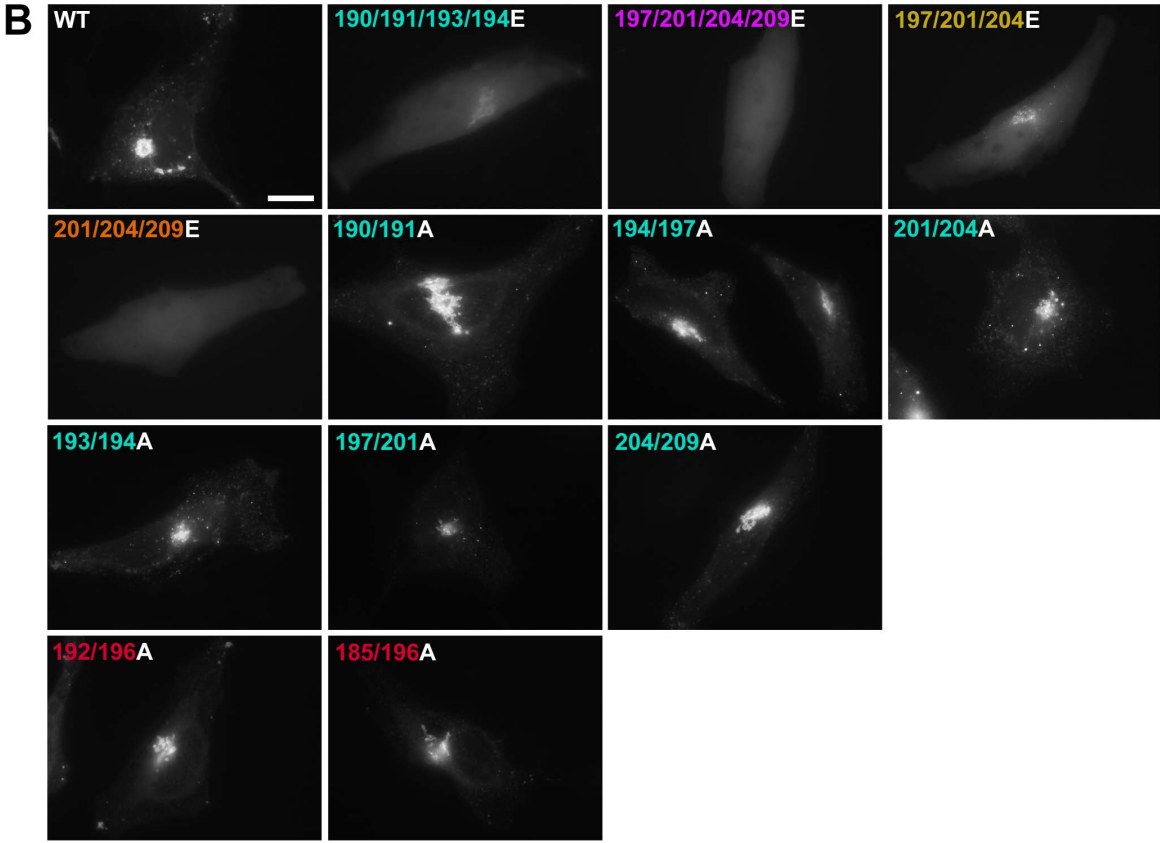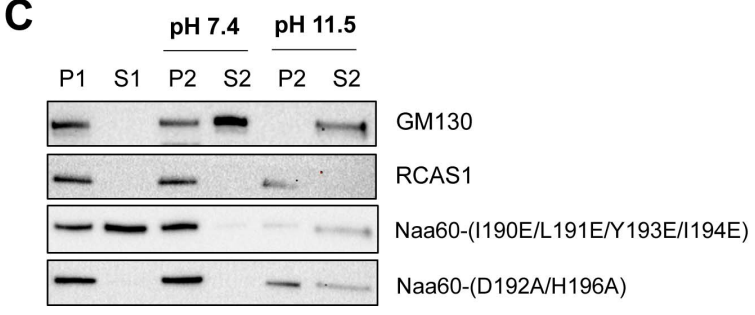

**A**

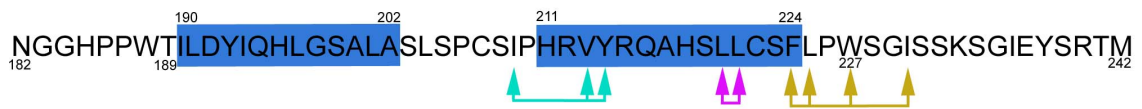

**B**

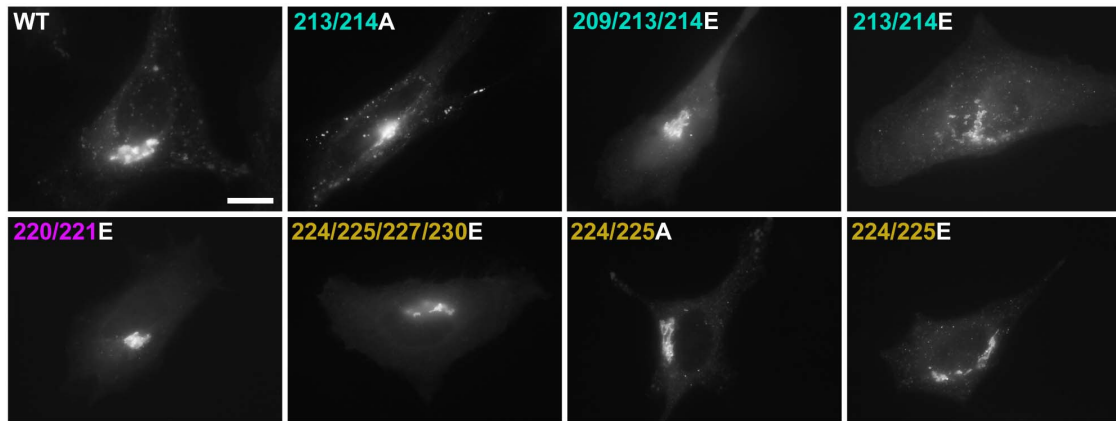

**C**

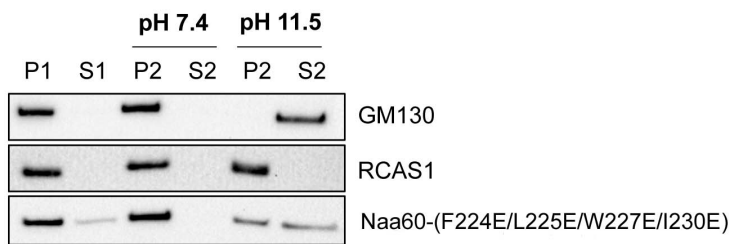

Figure S3

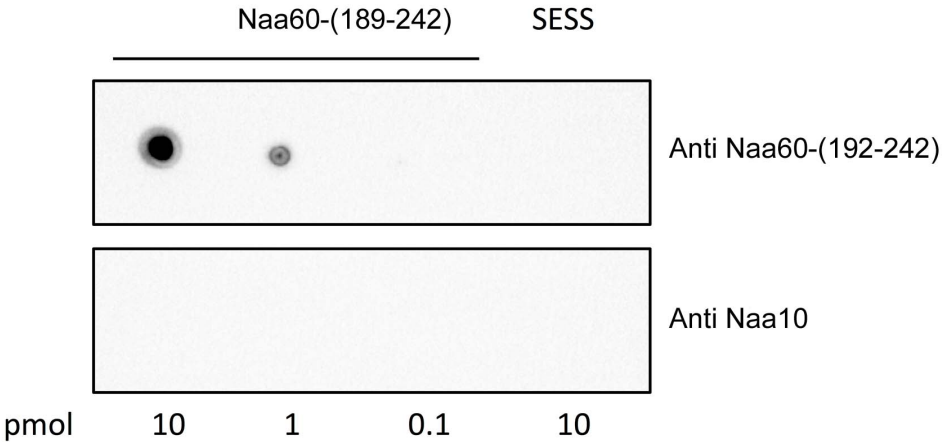

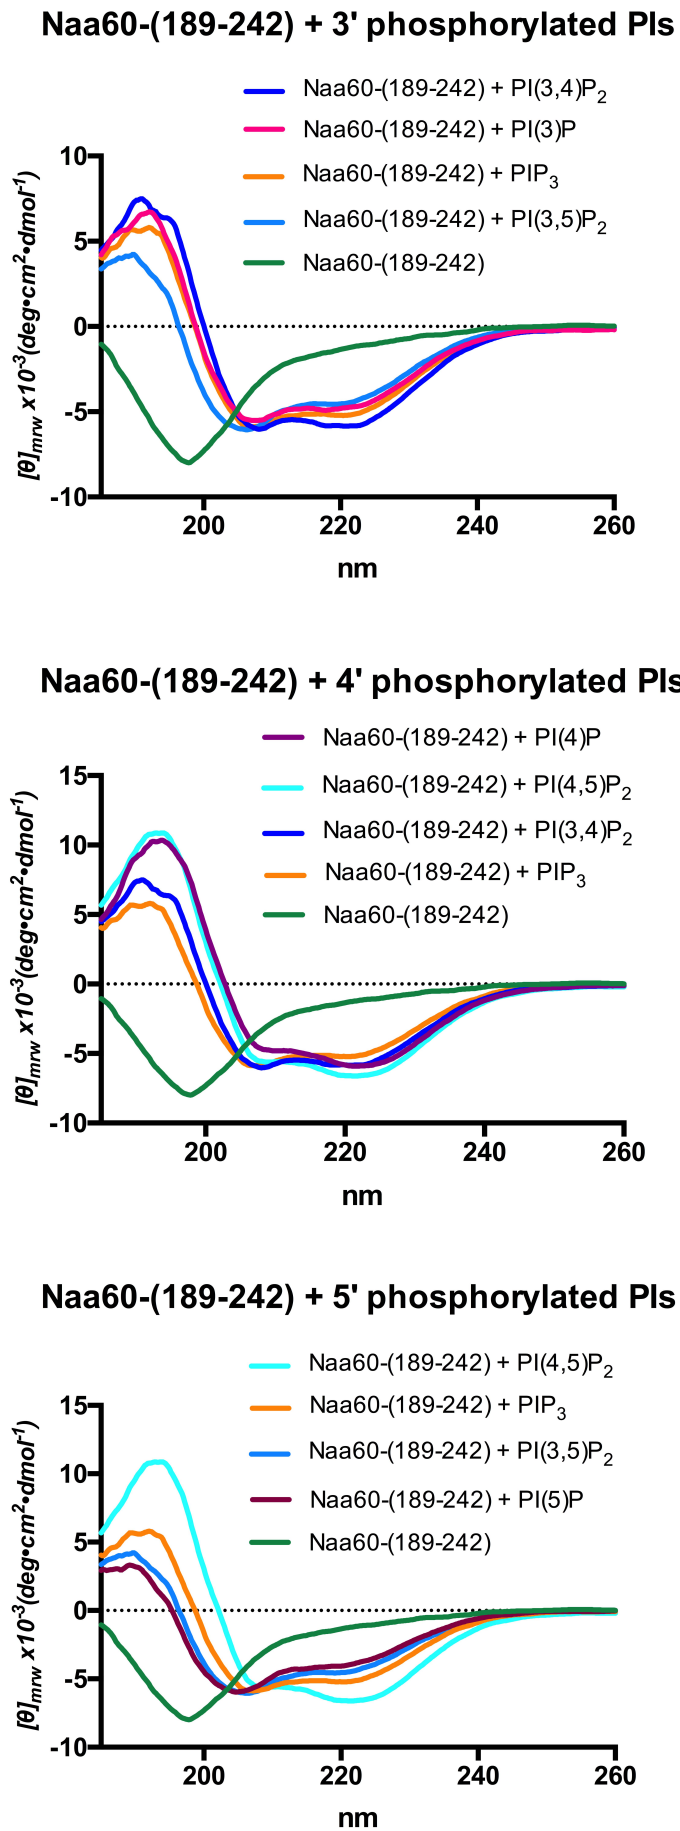

Supplement: 10.1074_M116.770362_jbc.M116.770362-1.pdf [file 10.1074_M116.770362_jbc.M116.770362-1.pdf]
